# Supplementary material for: Side Effects of COVID-19 Vaccines in Pregnant and Lactating Mexican Women and Breastfed Infants: A Survey-Based Study
Source: MDPI journal article supplement (doi:10.3390/vaccines11081280), 2023-07-25
Supplement: s1 [file s1]

**Table S1.** Variables description.

| Variable                                                | Recorded answers                                                                                                                                                                                                                                                                                                                                                                                                                                                                                                                                                                                                                                                                                                                                           |
|---------------------------------------------------------|------------------------------------------------------------------------------------------------------------------------------------------------------------------------------------------------------------------------------------------------------------------------------------------------------------------------------------------------------------------------------------------------------------------------------------------------------------------------------------------------------------------------------------------------------------------------------------------------------------------------------------------------------------------------------------------------------------------------------------------------------------|
| Vaccine type                                            | BNT162b2, ChAdOx1, Ad5-nCoV, CoronaVac, Gam-COVID-Vac, Ad26.CoV2.S, or ARNm-1273                                                                                                                                                                                                                                                                                                                                                                                                                                                                                                                                                                                                                                                                           |
| Vaccine doses                                           | 1 or 2                                                                                                                                                                                                                                                                                                                                                                                                                                                                                                                                                                                                                                                                                                                                                     |
| Medication prior to vaccination                         | Yes or no                                                                                                                                                                                                                                                                                                                                                                                                                                                                                                                                                                                                                                                                                                                                                  |
| Presentation of side effects                            | Yes or no                                                                                                                                                                                                                                                                                                                                                                                                                                                                                                                                                                                                                                                                                                                                                  |
| If yes, type of side effects                            | Local: Arm pain, Injection site pain, Injection site swelling, Injection site itching, Injection site redness<br>Systemic: Headache, Muscle pain, Fatigue or tiredness, Lack of energy, Fever, Desire to sleep, Chills, Malaise, Bone or joint pain, Nausea, Dizziness, Hot flashes, Eye movement pain, Sweating, Sore throat, Stuffy nose, Chest pain, Diarrhea, A faster or lower heartbeat, Irritated eyes, Running nose, Difficulty breathing or dyspnea, Abdominal pain, Lymph nodes tenderness or swelling, Cough, Rise in blood pressure, Vomiting, Lower blood pressure, Skin hives, Face and neck swelling, Bleeding, Skin spots, Loss of consciousness, Numbness, Mental symptoms, Spasms, General itchiness, Platelet effects, General swelling |
| Extension of side effects categorization                | None, Local, Systemic, Both                                                                                                                                                                                                                                                                                                                                                                                                                                                                                                                                                                                                                                                                                                                                |
| Took medicine to relieve symptoms                       | Yes or no                                                                                                                                                                                                                                                                                                                                                                                                                                                                                                                                                                                                                                                                                                                                                  |
| Suspended daily activities or missed work               | Yes or no                                                                                                                                                                                                                                                                                                                                                                                                                                                                                                                                                                                                                                                                                                                                                  |
| Sought medical attention (outpatient or emergency care) | Yes or no                                                                                                                                                                                                                                                                                                                                                                                                                                                                                                                                                                                                                                                                                                                                                  |
| Hospitalization                                         | Yes or no                                                                                                                                                                                                                                                                                                                                                                                                                                                                                                                                                                                                                                                                                                                                                  |
| Severity of side effects categorization                 | Absent (did not experience side effects)<br>Mild: Took medicine to relieve symptoms, but did not suspend daily activities, miss work, seek medical attention, or was hospitalized<br>Moderate: Took medicine to relieve symptoms, did suspend daily activities or missed work, but did not seek medical attention, or was hospitalized<br>Severe: Did seek medical attention or was hospitalized, regardless of the need to take medication to relieve symptoms, suspension of activities or missed work                                                                                                                                                                                                                                                   |
| Comorbidities                                           | Yes or no                                                                                                                                                                                                                                                                                                                                                                                                                                                                                                                                                                                                                                                                                                                                                  |
| If yes, type of comorbidity                             | Diabetes, High blood pressure, Renal disease, Chronic obstructive pulmonary disease, Asthma, Immunological disease, Cerebrovascular disease, cardiovascular disease, Hepatic disease.                                                                                                                                                                                                                                                                                                                                                                                                                                                                                                                                                                      |
| Schooling                                               | Middle school, High school, Bachelor's degree, or Postgraduate                                                                                                                                                                                                                                                                                                                                                                                                                                                                                                                                                                                                                                                                                             |
| History of allergies                                    | Yes or no                                                                                                                                                                                                                                                                                                                                                                                                                                                                                                                                                                                                                                                                                                                                                  |
| History of COVID-19 disease                             | Yes or no                                                                                                                                                                                                                                                                                                                                                                                                                                                                                                                                                                                                                                                                                                                                                  |
| Occupation                                              | Employed, Self-employed, Housewife, Retired, Unemployed, or Student                                                                                                                                                                                                                                                                                                                                                                                                                                                                                                                                                                                                                                                                                        |
| Tobacco smoking                                         | Yes or no                                                                                                                                                                                                                                                                                                                                                                                                                                                                                                                                                                                                                                                                                                                                                  |
| Nutritional status                                      | Low weight, Normal weight, Overweight, or Obese                                                                                                                                                                                                                                                                                                                                                                                                                                                                                                                                                                                                                                                                                                            |
| Age                                                     | Adults (years) / Infants (months)                                                                                                                                                                                                                                                                                                                                                                                                                                                                                                                                                                                                                                                                                                                          |
| Sex                                                     | Male or Female                                                                                                                                                                                                                                                                                                                                                                                                                                                                                                                                                                                                                                                                                                                                             |

**Table S2.** Extension of COVID-19 vaccination side effects according to number of doses and pregnancy status. Mexican female population, August - September 2021.

|                              |                                   | First Dose (n=2,804)                       |                   |       |                   |                                       | Second dose (n=1,492)                      |                   |     |                   |                                       |
|------------------------------|-----------------------------------|--------------------------------------------|-------------------|-------|-------------------|---------------------------------------|--------------------------------------------|-------------------|-----|-------------------|---------------------------------------|
|                              |                                   | Non-pregnant/non-breastfeeding (n = 2,694) |                   |       |                   |                                       | Non-pregnant/non-breastfeeding (n = 1,405) |                   |     |                   |                                       |
|                              |                                   | Pregnant (n = 110)                         |                   |       |                   | Pregnant (n =86)                      |                                            |                   |     |                   |                                       |
|                              |                                   | n                                          | % (95% CI)        | n     | % (95% CI)        | Chi-square or Fisher's <i>p</i> value | n                                          | % (95% CI)        | n   | % (95% CI)        | Chi-square or Fisher's <i>p</i> value |
| Extension                    |                                   |                                            |                   |       |                   |                                       |                                            |                   |     |                   |                                       |
|                              | No symptoms                       | 31                                         | 28.18 (20.6-37.2) | 602   | 22.3 (20.8, 24)   | 0.063                                 | 35                                         | 40.7 (30.9-51.3)  | 522 | 37.2 (34.7, 39.7) | 0.557                                 |
|                              | Local symptoms                    | 17                                         | 15.45 (9.9-23.4)  | 301   | 11.2 (10, 12.4)   |                                       | 12                                         | 13.95 (8.2-22.8)  | 176 | 12.5 (10.9, 14.4) |                                       |
|                              | Systemic symptoms                 | 4                                          | 3.64 (1.4-9)      | 248   | 9.2 (8.2, 10.4)   |                                       | 5                                          | 5.81 (2.5-12.9)   | 146 | 10.4 (8.9, 12.1)  |                                       |
|                              | Both, local and systemic symptoms | 58                                         | 52.73 (43.5-61.8) | 1,543 | 57.3 (55.4, 59.1) |                                       | 34                                         | 39.53 (29.9-50.1) | 561 | 39.9 (37.4, 42.5) |                                       |
| Type of local side effect    |                                   |                                            |                   |       |                   |                                       |                                            |                   |     |                   |                                       |
|                              | Arm pain                          | 63                                         | 57.27 (47.9-66.1) | 1,455 | 54 (52.1, 55.9)   | 0.495                                 | 38                                         | 44.19 (34.2-54.7) | 562 | 40 (37.5, 42.6)   | 0.439                                 |
|                              | Injection site pain               | 49                                         | 44.55 (35.6-53.9) | 1,268 | 47.1 (45.2, 49)   | 0.608                                 | 27                                         | 31.4 (22.6-41.8)  | 434 | 30.9 (28.5, 33.4) | 0.918                                 |
|                              | Injection site swelling           | 6                                          | 5.45 (2.5-11.4)   | 255   | 9.5 (8.4, 10.6)   | 0.156                                 | 2                                          | 2.33 (0.6-8.1)    | 79  | 5.6 (4.5, 7)      | 0.321 <sup>a</sup> 321 <sup>a</sup>   |
|                              | Injection site itching            | 6                                          | 5.45 (2.5-11.4)   | 138   | 5.1 (4.4, 6)      | 0.876                                 | 1                                          | 1.16 (0.2-6.3)    | 35  | 2.5 (1.8, 3.4)    | 0.719 <sup>a</sup> 719 <sup>a</sup>   |
|                              | Injection site redness            | 3                                          | 2.73 (0.9-7.7)    | 126   | 4.7 (3.9, 5.5)    | 0.339                                 | 0                                          | 0 (0-4.3)         | 38  | 2.7 (2, 3.7)      | 0.165 <sup>a</sup> 165 <sup>a</sup>   |
| Type of systemic side effect |                                   |                                            |                   |       |                   |                                       |                                            |                   |     |                   |                                       |
|                              | Headache                          | 34                                         | 30.91 (23-40.1)   | 1,083 | 40.17 (38.3, 42)  | 0.052                                 | 23                                         | 26.74 (18.5-36.9) | 385 | 27.4 (25.1, 29.8) | 0.897                                 |
|                              | Muscle pain                       | 26                                         | 23.64 (16.7-32.4) | 910   | 33.75 (32, 35.6)  | 0.027                                 | 13                                         | 15.12 (9.1-24.2)  | 273 | 19.4 (17.4, 21.6) | 0.325                                 |
|                              | Fatigue or tiredness              | 20                                         | 18.18 (12.1-26.4) | 768   | 28.5 (26.8, 30.2) | 0.018                                 | 21                                         | 24.42 (16.6-34.5) | 334 | 23.8 (21.6, 26.1) | 0.888                                 |
|                              | Lack of energy                    | 24                                         | 21.82 (15.1-30.4) | 774   | 28.7 (27.1, 30.5) | 0.116                                 | 14                                         | 16.28 (10-25.5)   | 214 | 15.2 (13.4, 17.2) | 0.791                                 |
|                              | Fever                             | 10                                         | 9.09 (5-15.9)     | 652   | 24.2 (22.6, 25.9) | 0.000                                 | 10                                         | 11.63 (6.4-20.1)  | 163 | 11.6 (10, 13.4)   | 0.992                                 |

|                                    |    | First Dose (n=2,804)                       |            |                   |                    |                                       | Second dose (n=1,492)                      |                  |                   |                    |                                       |
|------------------------------------|----|--------------------------------------------|------------|-------------------|--------------------|---------------------------------------|--------------------------------------------|------------------|-------------------|--------------------|---------------------------------------|
|                                    |    | Non-pregnant/non-breastfeeding (n = 2,694) |            |                   |                    |                                       | Non-pregnant/non-breastfeeding (n = 1,405) |                  |                   |                    |                                       |
|                                    |    | Pregnant (n = 110)                         |            | Pregnant (n =86)  |                    | Pregnant (n =86)                      |                                            | Pregnant (n =86) |                   | Pregnant (n =86)   |                                       |
|                                    |    | n                                          | % (95% CI) | n                 | % (95% CI)         | Chi-square or Fisher's <i>p</i> value | n                                          | % (95% CI)       | n                 | % (95% CI)         | Chi-square or Fisher's <i>p</i> value |
| Desire to sleep                    | 26 | 23.64 (16.7-32.4)                          | 653        | 24.2 (22.7, 25.9) | 0.888              | 14                                    | 16.28 (10-25.5)                            | 212              | 15.1 (13.3, 17.1) | 0.763              |                                       |
| Chills                             | 16 | 14.55 (9.2-22.3)                           | 586        | 21.8 (20.2, 23.3) | 0.072              | 8                                     | 9.3 (4.8-17.3)                             | 158              | 11.2 (9.7, 13)    | 0.580              |                                       |
| Malaise                            | 12 | 10.91 (6.4-18.1)                           | 540        | 20 (18.6, 21.6)   | 0.018              | 10                                    | 11.63 (6.4-20.1)                           | 188              | 13.4 (11.7, 15.3) | 0.644              |                                       |
| Bone or joint pain                 | 14 | 12.73 (7.7-20.2)                           | 514        | 19.1 (17.6, 20.6) | 0.095              | 6                                     | 6.98 (3.2-14.4)                            | 163              | 11.6 (10, 13.4)   | 0.190              |                                       |
| Nausea                             | 5  | 4.55 (2-10.2)                              | 203        | 7.5 (6.6, 8.6)    | 0.242              | 6                                     | 6.98 (3.2-14.4)                            | 49               | 3.5 (2.6, 4.6)    | 0.128 <sup>a</sup> |                                       |
| Dizziness                          | 2  | 1.82 (0.5-6.4)                             | 191        | 7.1 (6.2, 8.1)    | 0.032              | 2                                     | 2.33 (0.6-8.1)                             | 59               | 4.2 (3.3, 5.4)    | 0.576 <sup>a</sup> |                                       |
| Hot flashes                        | 2  | 1.82 (0.5-6.4)                             | 185        | 6.9 (6, 7.9)      | 0.038              | 1                                     | 1.16 (0.2-6.3)                             | 45               | 3.2 (2.4, 4.3)    | 0.515 <sup>a</sup> |                                       |
| Eye movement pain                  | 5  | 4.55 (2-10.2)                              | 177        | 6.6 (5.7, 7.6)    | 0.399              | 4                                     | 4.65 (1.8-11.4)                            | 37               | 2.6 (1.9, 3.6)    | 0.292 <sup>a</sup> |                                       |
| Sweating                           | 3  | 2.73 (0.9-7.7)                             | 173        | 6.4 (5.6, 7.4)    | 0.118              | 3                                     | 3.49 (1.2-9.8)                             | 39               | 2.8 (2, 3.8)      | 0.731 <sup>a</sup> |                                       |
| Sore throat                        | 2  | 1.82 (0.5-6.4)                             | 146        | 5.4 (4.6, 6.3)    | 0.098              | 2                                     | 2.33 (0.6-8.1)                             | 51               | 3.6 (2.8, 4.7)    | 0.765 <sup>a</sup> |                                       |
| Stuffy nose                        | 2  | 1.82 (0.5-6.4)                             | 147        | 5.5 (4.7, 6.4)    | 0.096              | 6                                     | 6.98 (3.2-14.4)                            | 42               | 3 (2.2, 4)        | 0.054 <sup>a</sup> |                                       |
| Chest pain                         | 0  | 0 (0-3.4)                                  | 137        | 5.1 (4.3, 6)      | 0.015              | 0                                     | 0 (0-4.3)                                  | 30               | 2.1 (1.5, 3)      | 0.413 <sup>a</sup> |                                       |
| Diarrhea                           | 4  | 3.64 (1.4-9)                               | 128        | 4.8 (4, 5.6)      | 0.589              | 3                                     | 3.49 (1.2-9.8)                             | 52               | 3.7 (2.8, 4.8)    | 1.000 <sup>a</sup> |                                       |
| A faster or lower heartbeat        | 3  | 2.73 (0.9-7.7)                             | 135        | 5 (4.2, 5.9)      | 0.278              | 0                                     | 0 (0-4.3)                                  | 31               | 2.2 (1.6, 3.1)    | 0.254 <sup>a</sup> |                                       |
| Irritated eyes                     | 1  | 0.91 (0.2-5)                               | 89         | 3.3 (2.7, 4)      | 0.263 <sup>a</sup> | 0                                     | 0 (0-4.3)                                  | 23               | 1.6 (1.1, 2.4)    | 0.639 <sup>a</sup> |                                       |
| Running nose                       | 2  | 1.82 (0.5-6.4)                             | 88         | 3.3 (2.7, 4)      | 0.582 <sup>a</sup> | 3                                     | 3.49 (1.2-9.8)                             | 39               | 2.8 (2, 3.8)      | 0.731 <sup>a</sup> |                                       |
| Difficulty breathing (dyspnea)     | 1  | 0.91 (0.2-5)                               | 82         | 3 (2.5, 3.8)      | 0.379 <sup>a</sup> | 0                                     | 0 (0-4.3)                                  | 16               | 1.1 (0.7, 1.8)    | 0.445 <sup>a</sup> |                                       |
| Abdominal pain                     | 1  | 0.91 (0.2-5)                               | 73         | 2.7 (2.2, 3.4)    | 0.367 <sup>a</sup> | 0                                     | 0 (0-4.3)                                  | 23               | 1.6 (1.1, 2.4)    | 0.639 <sup>a</sup> |                                       |
| Lymph nodes tenderness or swelling | 1  | 0.91 (0.2-5)                               | 67         | 2.5 (2, 3.1)      | 0.521 <sup>a</sup> | 0                                     | 0 (0-4.3)                                  | 32               | 2.3 (1.6, 3.2)    | 0.255 <sup>a</sup> |                                       |
| Cough                              | 1  | 0.91 (0.2-5)                               | 70         | 2.6 (2.1, 3.3)    | 0.527 <sup>a</sup> | 2                                     | 2.33 (0.6-8.1)                             | 24               | 1.7 (1.2, 2.5)    | 0.659 <sup>a</sup> |                                       |

| First Dose (n=2,804)                       |   |                |            |                 |                    | Second dose (n=1,492)                      |                 |            |                |                    |                                       |
|--------------------------------------------|---|----------------|------------|-----------------|--------------------|--------------------------------------------|-----------------|------------|----------------|--------------------|---------------------------------------|
| Non-pregnant/non-breastfeeding (n = 2,694) |   |                |            |                 |                    | Non-pregnant/non-breastfeeding (n = 1,405) |                 |            |                |                    |                                       |
| Pregnant (n = 110)                         |   |                |            |                 |                    | Pregnant (n =86)                           |                 |            |                |                    |                                       |
|                                            |   |                |            |                 |                    |                                            |                 |            |                |                    |                                       |
|                                            |   |                |            |                 |                    | Chi-square or Fisher's <i>p</i> value      |                 |            |                |                    | Chi-square or Fisher's <i>p</i> value |
|                                            |   |                |            |                 |                    |                                            |                 |            |                |                    |                                       |
|                                            |   | n              | % (95% CI) | n               | % (95% CI)         |                                            | n               | % (95% CI) | n              | % (95% CI)         |                                       |
| Rise in blood pressure                     | 1 | 0.91 (0.2-5)   | 60         | 2.2 (1.7, 2.9)  | 0.732 <sup>a</sup> | 0                                          | 0 (0-4.3)       | 10         | 0.7 (0.4, 1.3) | 1.000 <sup>a</sup> |                                       |
| Vomiting                                   | 2 | 1.82 (0.5-6.4) | 45         | 1.7 (1.3, 2.2)  | 0.707 <sup>a</sup> | 1                                          | 1.16 (0.2- 6.3) | 14         | 1 (0.6, 1.7)   | 0.592 <sup>a</sup> |                                       |
| Lower blood pressure                       | 0 | 0 (0-3.4)      | 38         | 1.4 (1, 1.9)    | 0.402 <sup>a</sup> | 0                                          | 0 (0-4.3)       | 6          | 0.4 (0.2, 0.9) | 1.000 <sup>a</sup> |                                       |
| Skin hives                                 | 1 | 0.91 (0.2-5)   | 30         | 1.1 (0.8, 1.6)  | 1.000 <sup>a</sup> | 0                                          | 0 (0-4.3)       | 5          | 0.4 (0.2, 0.8) | 1.000 <sup>a</sup> |                                       |
| Face and neck swelling                     | 1 | 0.91 (0.2-5)   | 20         | 0.7 (0.5, 1.1)  | 1.000 <sup>a</sup> | 0                                          | 0 (0-4.3)       | 4          | 0.3 (0.1, 0.7) | 1.000 <sup>a</sup> |                                       |
| Bleeding                                   | 0 | 0 (0-3.4)      | 17         | 0.6 (0.4, 1)    | 1.000 <sup>a</sup> | 0                                          | 0 (0-4.3)       | 1          | 0.1 (0, 0.4)   | 1.000 <sup>a</sup> |                                       |
| Skin spots                                 | 0 | 0 (0-3.4)      | 14         | 0.5 (0.3, 0.9)  | 1.000 <sup>a</sup> | 0                                          | 0 (0-4.3)       | 2          | 0.1 (0, 0.5)   | 1.000 <sup>a</sup> |                                       |
| Loss of consciousness                      | 0 | 0 (0-3.4)      | 12         | 0.45 (0.3, 0.8) | 1.000 <sup>a</sup> | 0                                          | 0 (0-4.3)       | 3          | 0.2 (0.1, 0.6) | 1.000 <sup>a</sup> |                                       |
| Numbness                                   | 0 | 0 (0-3.4)      | 12         | 0.4 (0.3, 0.8)  | 1.000 <sup>a</sup> | 0                                          | 0 (0-4.3)       | 4          | 0.3 (0.1, 0.7) | 1.000 <sup>a</sup> |                                       |
| Mental symptoms                            | 0 | 0 (0-3.4)      | 6          | 0.2 (0.1, 0.5)  | 1.000 <sup>a</sup> | 0                                          | 0 (0-4.3)       | 2          | 0.1 (0, 0.5)   | 1.000 <sup>a</sup> |                                       |

<sup>a</sup> This data was analyzed by Fisher's exact test.

**Table S3.** Extension of COVID-19 vaccination side effects according to number of doses and breastfeeding status. Mexican female population-August - September 2021.

| First or only dose (3,057)   |                             |                       |                   |                                               |                   | Second dose (1,522)                         |                       |                   |                                              |                   |                                             |
|------------------------------|-----------------------------|-----------------------|-------------------|-----------------------------------------------|-------------------|---------------------------------------------|-----------------------|-------------------|----------------------------------------------|-------------------|---------------------------------------------|
|                              |                             |                       |                   | Non-pregnant/non-<br>breastfeeding (n= 2,694) |                   | Chi-square<br>or Fisher's<br><i>p</i> value |                       |                   | Non-pregnant/non-<br>breastfeeding (n=1,406) |                   | Chi-square or<br>Fisher's <i>p</i><br>value |
|                              |                             | Breastfeeding (n=363) |                   |                                               |                   |                                             | Breastfeeding (n=116) |                   |                                              |                   |                                             |
|                              |                             | n                     | % (95% CI)        | n                                             | % (95% CI)        |                                             | n                     | % (95% CI)        | n                                            | % (95% CI)        |                                             |
| Extension                    |                             |                       |                   |                                               |                   |                                             |                       |                   |                                              |                   |                                             |
|                              | No symptoms                 | 76                    | 20.94 (17.1-25.4) | 6022                                          | 22.3 (20.8, 24)   | 0.040                                       | 24                    | 20.69 (14.3-28.9) | 5222                                         | 37.2 (34.7, 39.7) | <0.0011                                     |
|                              | Local symptoms              | 24                    | 6.61 (4.5-9.6)    | 301                                           | 11.2 (10, 12.4)   |                                             | 25                    | 21.55 (15-29.9)   | 176                                          | 12.5 (10.9, 14.4) |                                             |
|                              | Systemic symptoms           | 35                    | 9.64 (7-13.1)     | 248                                           | 9.2 (8.2, 10.4)   |                                             | 10                    | 8.62 (4.7-15.1)   | 146                                          | 10.4 (8.9, 12.1)  |                                             |
|                              | Local and systemic symptoms | 228                   | 62.81 (57.7-67.6) | 1,543                                         | 57.3 (55.4, 59.1) |                                             | 57                    | 49.14 (40.2-58.1) | 561                                          | 39.9 (37.4, 42.5) |                                             |
| Type of local side effect    |                             |                       |                   |                                               |                   |                                             |                       |                   |                                              |                   |                                             |
|                              | Arm pain                    | 202                   | 55.65 (50.5-60.7) | 1,455                                         | 54 (52.1, 55.9)   | 0.547                                       | 68                    | 58.62 (49.5-67.2) | 562                                          | 40 (37.5, 42.6)   | <0.0011                                     |
|                              | Injection site pain         | 172                   | 47.38 (42.3-52.5) | 1,268                                         | 47.1 (45.2, 49)   | 0.900                                       | 49                    | 42.24 (33.6-51.3) | 434                                          | 30.9 (28.5, 33.4) | 0.011                                       |
|                              | Injection site swelling     | 32                    | 8.82 (6.3-12.2)   | 255                                           | 9.5 (8.4, 10.6)   | 0.693                                       | 10                    | 8.62 (4.7-15.1)   | 79                                           | 5.6 (4.5, 7)      | 0.185                                       |
|                              | Injection site itching      | 23                    | 6.34 (4.3-9.3)    | 138                                           | 5.1 (4.4, 6)      | 0.329                                       | 5                     | 4.31 (1.9-9.7)    | 35                                           | 2.5 (1.8, 3.4)    | 0.239                                       |
|                              | Injection site redness      | 18                    | 4.96 (3.2-7.7)    | 126                                           | 4.7 (3.9, 5.5)    | 0.810                                       | 5                     | 4.31 (1.9-9.7)    | 38                                           | 2.7 (2, 3.7)      | 0.315                                       |
| Type of systemic side effect |                             |                       |                   |                                               |                   |                                             |                       |                   |                                              |                   |                                             |
|                              | Headache                    | 169                   | 46.56 (41.5-51.7) | 1,083                                         | 40.17 (38.3, 42)  | 0.020                                       | 41                    | 35.34 (27.2-44.4) | 385                                          | 27.4 (25.1, 29.8) | 0.066                                       |
|                              | Muscle pain                 | 141                   | 38.84 (34-43.9)   | 910                                           | 33.75 (32, 35.6)  | 0.055                                       | 27                    | 23.28 (16.5-31.7) | 273                                          | 19.4 (17.4, 21.6) | 0.315                                       |
|                              | Fatigue or tiredness        | 125                   | 34.44 (29.7-39.5) | 768                                           | 28.5 (26.8, 30.2) | 0.019                                       | 37                    | 31.9 (24.1-40.8)  | 334                                          | 23.8 (21.6, 26.1) | 0.050                                       |
|                              | Lack of energy              | 116                   | 31.96 (27.4-36.9) | 774                                           | 28.7 (27.1, 30.5) | 0.201                                       | 22                    | 18.97 (12.9-27)   | 214                                          | 15.2 (13.4, 17.2) | 0.284                                       |
|                              | Fever                       | 90                    | 24.79 (20.6-29.5) | 652                                           | 24.2 (22.6, 25.9) | 0.799                                       | 11                    | 9.48 (5.4-16.2)   | 163                                          | 11.6 (10, 13.4)   | 0.492                                       |
|                              | Desire to sleep             | 78                    | 21.49 (17.6-26)   | 653                                           | 24.2 (22.7, 25.9) | 0.252                                       | 22                    | 18.97 (12.9-27)   | 212                                          | 15.1 (13.3, 17.1) | 0.265                                       |
|                              | Chills                      | 86                    | 23.69 (19.6-28.3) | 586                                           | 21.8 (20.2, 23.3) | 0.398                                       | 7                     | 6.03 (3-11.9)     | 158                                          | 11.2 (9.7, 13)    | 0.083                                       |

| First or only dose (3,057)         |                       |                   |                                           |                   |                                       | Second dose (1,522)   |                  |                                          |                   |                                       |  |
|------------------------------------|-----------------------|-------------------|-------------------------------------------|-------------------|---------------------------------------|-----------------------|------------------|------------------------------------------|-------------------|---------------------------------------|--|
|                                    | Breastfeeding (n=363) |                   | Non-pregnant/non-breastfeeding (n= 2,694) |                   | Chi-square or Fisher's <i>p</i> value | Breastfeeding (n=116) |                  | Non-pregnant/non-breastfeeding (n=1,406) |                   | Chi-square or Fisher's <i>p</i> value |  |
|                                    | n                     | % (95% CI)        | n                                         | % (95% CI)        |                                       | n                     | % (95% CI)       | n                                        | % (95% CI)        |                                       |  |
| Malaise                            | 80                    | 22.04 (18.1-26.6) | 540                                       | 20 (18.6, 21.6)   | 0.371                                 | 16                    | 13.79 (8.7-21.2) | 188                                      | 13.4 (11.7, 15.3) | 0.898                                 |  |
| Bone or joint pain                 | 86                    | 23.69 (19.6-28.3) | 514                                       | 19.1 (17.6, 20.6) | 0.037                                 | 16                    | 13.79 (8.7-21.2) | 163                                      | 11.6 (10, 13.4)   | 0.480                                 |  |
| Nausea                             | 43                    | 11.85 (8.9-15.6)  | 203                                       | 7.5 (6.6, 8.6)    | 0.005                                 | 6                     | 5.17 (2.4-10.8)  | 49                                       | 3.5 (2.6, 4.6)    | 0.050 <sup>a</sup>                    |  |
| Dizziness                          | 42                    | 11.57 (8.7-15.3)  | 191                                       | 7.1 (6.2, 8.1)    | 0.002                                 | 9                     | 7.76 (4.1-14.1)  | 59                                       | 4.2 (3.3, 5.4)    | 0.074                                 |  |
| Hot flashes                        | 29                    | 7.99 (5.6-11.2)   | 185                                       | 6.9 (6, 7.9)      | 0.429                                 | 4                     | 3.45 (1.3-8.5)   | 45                                       | 3.2 (2.4, 4.3)    | 0.785 <sup>a</sup>                    |  |
| Eye movement pain                  | 33                    | 9.09 (6.5-12.5)   | 177                                       | 6.6 (5.7, 7.6)    | 0.074                                 | 4                     | 3.45 (1.3-8.5)   | 37                                       | 2.6 (1.9, 3.6)    | 0.548 <sup>a</sup>                    |  |
| Sweating                           | 26                    | 7.16 (4.9-10.3)   | 173                                       | 6.4 (5.6, 7.4)    | 0.589                                 | 4                     | 3.45 (1.3-8.5)   | 39                                       | 2.8 (2, 3.8)      | 0.564 <sup>a</sup>                    |  |
| Sore throat                        | 21                    | 5.79 (3.8-8.7)    | 146                                       | 5.4 (4.6, 6.3)    | 0.771                                 | 6                     | 5.17 (2.4-10.8)  | 51                                       | 3.6 (2.8, 4.7)    | 0.439 <sup>a</sup>                    |  |
| Stuffy nose                        | 17                    | 4.68 (2.9-7.4)    | 147                                       | 5.5 (4.7, 6.4)    | 0.541                                 | 5                     | 4.31 (1.9-9.7)   | 42                                       | 3 (2.2, 4)        | 0.399 <sup>a</sup>                    |  |
| Chest pain                         | 20                    | 5.51 (3.6-8.4)    | 137                                       | 5.1 (4.3, 6)      | 0.729                                 | 2                     | 1.72 (0.5-6.1)   | 30                                       | 2.1 (1.5, 3)      | 1.000 <sup>a</sup>                    |  |
| Diarrhea                           | 14                    | 3.86 (2.3-6.4)    | 128                                       | 4.8 (4, 5.6)      | 0.449                                 | 6                     | 5.17 (2.4-10.8)  | 52                                       | 3.7 (2.8, 4.8)    | 0.444 <sup>a</sup>                    |  |
| A faster or lower heartbeat        | 11                    | 3.03 (1.7-5.3)    | 135                                       | 5 (4.2, 5.9)      | 0.097                                 | 4                     | 3.45 (1.3-8.5)   | 31                                       | 2.2 (1.6, 3.1)    | 0.335 <sup>a</sup>                    |  |
| Irritated eyes                     | 16                    | 4.41 (2.7-7)      | 89                                        | 3.3 (2.7, 4)      | 0.277                                 | 0                     | 0 (0-3.2)        | 23                                       | 1.6 (1.1, 2.4)    | 0.251 <sup>a</sup>                    |  |
| Running nose                       | 12                    | 3.31 (1.9-5.7)    | 88                                        | 3.3 (2.7, 4)      | 0.967                                 | 1                     | 0.86 (0.2-4.7)   | 39                                       | 2.8 (2, 3.8)      | 0.361 <sup>a</sup>                    |  |
| Difficulty breathing (dyspnea)     | 10                    | 2.75 (1.5-5)      | 82                                        | 3 (2.5, 3.8)      | 0.764                                 | 2                     | 1.72 (0.5-6.1)   | 16                                       | 1.1 (0.7, 1.8)    | 0.642 <sup>a</sup>                    |  |
| Abdominal pain                     | 11                    | 3.03 (1.7-5.3)    | 73                                        | 2.7 (2.2, 3.4)    | 0.724                                 | 0                     | 0 (0-3.2)        | 23                                       | 1.6 (1.1, 2.4)    | 0.251 <sup>a</sup>                    |  |
| Lymph nodes tenderness or swelling | 13                    | 3.58 (2.1-6)      | 67                                        | 2.5 (2, 3.1)      | 0.219                                 | 2                     | 1.72 (0.5-6.1)   | 32                                       | 2.3 (1.6, 3.2)    | 1.000 <sup>a</sup>                    |  |
| Cough                              | 10                    | 2.75 (1.5-5)      | 70                                        | 2.6 (2.1, 3.3)    | 0.859                                 | 0                     | 0 (0-3.2)        | 24                                       | 1.7 (1.2, 2.5)    | 0.251 <sup>a</sup>                    |  |
| Rise in blood pressure             | 9                     | 2.48 (1.3-4.6)    | 60                                        | 2.2 (1.7, 2.9)    | 0.760                                 | 0                     | 0 (0-3.2)        | 10                                       | 0.7 (0.4, 1.3)    | 1.000 <sup>a</sup>                    |  |
| Vomiting                           | 7                     | 1.93 (0.9-3.9)    | 45                                        | 1.7 (1.3, 2.2)    | 0.720                                 | 3                     | 2.59 (0.9-7.3)   | 14                                       | 1 (0.6, 1.7)      | 0.134 <sup>a</sup>                    |  |
| Lower blood pressure               | 3                     | 0.83 (0.3-2.4)    | 38                                        | 1.4 (1, 1.9)      | 0.472 <sup>a</sup>                    | 0                     | 0 (0-3.2)        | 6                                        | 0.4 (0.2, 0.9)    | 1.000 <sup>a</sup>                    |  |

| First or only dose (3,057) |                       |                |                                           |                 |                                       | Second dose (1,522)   |                |                                          |                |                                       |
|----------------------------|-----------------------|----------------|-------------------------------------------|-----------------|---------------------------------------|-----------------------|----------------|------------------------------------------|----------------|---------------------------------------|
|                            | Breastfeeding (n=363) |                | Non-pregnant/non-breastfeeding (n= 2,694) |                 | Chi-square or Fisher's <i>p</i> value | Breastfeeding (n=116) |                | Non-pregnant/non-breastfeeding (n=1,406) |                | Chi-square or Fisher's <i>p</i> value |
|                            | n                     | % (95% CI)     | n                                         | % (95% CI)      |                                       | n                     | % (95% CI)     | n                                        | % (95% CI)     |                                       |
| Skin hives                 | 0                     | 0 (0-1)        | 30                                        | 1.1 (0.8, 1.6)  | 0.042 <sup>a</sup>                    | 1                     | 0.86 (0.2-4.7) | 5                                        | 0.4 (0.2, 0.8) | 1.000 <sup>a</sup>                    |
| Face and neck swelling     | 3                     | 0.83 (0.3-2.4) | 20                                        | 0.7 (0.5, 1.1)  | 0.749 <sup>a</sup>                    | 1                     | 0.86 (0.2-4.7) | 4                                        | 0.3 (0.1, 0.7) | 0.328 <sup>a</sup>                    |
| Bleeding                   | 1                     | 0.28 (0-1.5)   | 17                                        | 0.6 (0.4, 1)    | 0.714 <sup>a</sup>                    | 0                     | 0 (0-3.2)      | 1                                        | 0.1 (0, 0.4)   | 1.000 <sup>a</sup>                    |
| Skin spots                 | 1                     | 0.28 (0-1.5)   | 14                                        | 0.5 (0.3, 0.9)  | 1.000 <sup>a</sup>                    | 1                     | 0.86 (0.2-4.7) | 2                                        | 0.1 (0, 0.5)   | 0.212 <sup>a</sup>                    |
| Loss of consciousness      | 2                     | 0.55 (0.2-2)   | 12                                        | 0.45 (0.3, 0.8) | 0.678 <sup>a</sup>                    | 2                     | 1.72 (0.5-6.1) | 3                                        | 0.2 (0.1, 0.6) | 0.050 <sup>a</sup>                    |
| Numbness                   | 0                     | 0 (0-1)        | 12                                        | 0.4 (0.3, 0.8)  | 0.381 <sup>a</sup>                    | 0                     | 0 (0-3.2)      | 4                                        | 0.3 (0.1, 0.7) | 1.000 <sup>a</sup>                    |
| Mental symptoms            | 0                     | 0 (0-1)        | 6                                         | 0.2 (0.1, 0.5)  | 1.000 <sup>a</sup>                    | 0                     | 0 (0-3.2)      | 2                                        | 0.1 (0, 0.5)   | 1.000 <sup>a</sup>                    |
| Spasms                     | 0                     | 0 (0-1)        | 2                                         | 0.1 (0, 0.3)    | 1.000 <sup>a</sup>                    | 0                     | 0 (0-3.2)      | 2                                        | 0.1 (0, 0.5)   | 1.000 <sup>a</sup>                    |

<sup>a</sup> This data was analyzed by Fisher's exact test

**Table S4.** Presentation of symptoms in breastfed infants by age and type of vaccine.

| Symptom presentation |               |                     |                     |
|----------------------|---------------|---------------------|---------------------|
|                      | Total (n=363) | No (n=323)<br>n (%) | Yes (n=40)<br>n (%) |
| Age of infant        |               |                     |                     |
| 0-2 months           | 29            | 26 (89.7)           | 3 (10.3)            |
| 2.1-4 months         | 25            | 21 (84)             | 4 (16)              |
| 4.1-6 months         | 25            | 18 (72)             | 7 (28)              |
| 6.1 and older        | 284           | 258 (90.8)          | 26 (9.2)            |
| Type of vaccine      |               |                     |                     |
| BNT162b2             | 115           | 107 (93)            | 8 (7)               |
| ChAdOx1              | 133           | 111 (83.5)          | 22 (16.5)           |
| Ad5-nCoV             | 61            | 58 (95.1)           | 3 (4.9)             |
| CoronaVac            | 22            | 17 (77.3)           | 5 (22.7)            |
| Gam-COVID-Vac        | 22            | 21 (95.5)           | 1 (4.5)             |
| ARNm-1273            | 4             | 3 (75)              | 1 (25)              |
| Ad26.CoV2.S          | 6             | 6 (100)             | 0 (0)               |

**Table S5.** Side effects reported by mothers in their breastfed infants after COVID-19 vaccination.

| Symptoms             | Total (n=363) |
|----------------------|---------------|
| Irritability         | 12            |
| Fever                | 9             |
| Diarrhoea            | 9             |
| Desire to sleep      | 6             |
| Malaise              | 5             |
| Vomit                | 4             |
| Running/stuffy nose  | 3             |
| Lack of energy       | 2             |
| Cough                | 2             |
| General body pain    | 1             |
| Flu like symptoms    | 1             |
| Breathing difficulty | 1             |
| Nasal bleeding       | 1             |
